# Supplementary material
Source: publisher figshare collection journal article supplement (https://diabetesjournals.figshare.com/articles/dataset/_/12654227)

**Supplementary Appendix**

Supplement to: **White rice intake and incident diabetes: A study of 132,373 participants in  
21 countries**

## Table of Contents

|                                                                                                                  |         |
|------------------------------------------------------------------------------------------------------------------|---------|
| Table S1: PURE Food frequency questionnaire validation studies                                                   | Page 3  |
| Table S2-A: De-attenuated Correlation Coefficients of Nutrient Intake                                            | Page 4  |
| Table S2-B: De-attenuated correlation coefficients of Food Intake (g/d)                                          | Page 4  |
| Table S2-C: Correlation between serum triglycerides and white rice intake (n=132,373)                            | Page 4  |
| Table S3: Baseline characteristics of study participants by geographic regions                                   | Page 5  |
| Table S4: Baseline characteristics of study participants -overall, South Asia, Rest of the world and China       | Page 6  |
| Table S5 A: Association between white rice intake and incident diabetes – stratified by family history           | Page 7  |
| Table S5 B: Association between white rice intake and incident diabetes – stratified by physical activity        | Page 7  |
| Table S5 C: Association between white rice intake and incident diabetes - stratified by BMI                      | Page 8  |
| Table S5 D: Association between white rice intake and incident diabetes - stratified by WHR                      | Page 9  |
| Table S6: Association of white rice intake with incident diabetes – in different world regions                   | Page 10 |
| Figure S1 A: Pooled analysis of PURE regions                                                                     | Page 11 |
| Figure S1 B – Pooled analysis of PURE regions - Sensitivity Analysis – excluding North America/Europe and Africa | Page 11 |

**Table S1: PURE food frequency validation studies**

| Country      | Validated | Reference dietary method | Reference                                                                                                                                                                                                 |
|--------------|-----------|--------------------------|-----------------------------------------------------------------------------------------------------------------------------------------------------------------------------------------------------------|
| Argentina    | Yes       | Multiple dietary recalls | Dehghan et al. PLoS One. 2012;7(5):e37958                                                                                                                                                                 |
| Brazil       | Yes       | Multiple dietary recalls | Under preparation                                                                                                                                                                                         |
| Canada       | Yes       | Multiple dietary recalls | Kelemen L et al. J Am Diet Assoc. 2003 103(9):1178-84                                                                                                                                                     |
| Chile        | Yes       | Multiple dietary recalls | Dehghan et al. Public Health Nutr. 2013;16 (10):1782-8.                                                                                                                                                   |
| China        | Yes       | Multiple dietary recalls | Zhao WH et al. Biomedical and environmental sciences. 2010; 23(suppl.), 1-38.                                                                                                                             |
| Colombia     | Yes       | Multiple dietary recalls | Dehghan et al. J Nutr Educ Behav. 2012;44(6):609-13.                                                                                                                                                      |
| Iran         | Yes       | Multiple dietary recalls | Under preparation                                                                                                                                                                                         |
| India        | Yes       | Multiple dietary recalls | Iqbal R et al. Public Health Nutr. 2009; 12(1):12-18<br><br>Bharati A et al. Asia Pac J Clin Nutr 2008; 14(1):178-185.<br><br>Mahajan R et al. The National Medical Journal of India vol. 26, no. 5, 2013 |
| Malaysia     | Yes       | Multiple dietary recalls | Book chapter                                                                                                                                                                                              |
| Palestine    | Yes       | Multiple dietary recalls | Under preparation                                                                                                                                                                                         |
| Poland       | Yes       | Multiple dietary recalls | Dehghan et al. J Hum Nutr Diet. 2012; 25(3):225-32                                                                                                                                                        |
| Sweden       | Yes       | Multiple dietary recalls | Khani B et al. J Nutr. 2004, 134:1541-1545                                                                                                                                                                |
| South Africa | Yes       | Multiple dietary recalls | MacIntyre UE et al. Public health nutr. 2000; 4(1), 63-71                                                                                                                                                 |
| Turkey       | Yes       | Multiple dietary recalls | Gunes eat al. J Pak Med Assoc. 2015; 65(7):756-63.                                                                                                                                                        |
| UAE          | Yes       | Multiple dietary recalls | Dehghan et al. Nutr J. 2005;4:18                                                                                                                                                                          |
| Kuwait/UAE   | Yes       | Multiple dietary recalls | Dehghan et al. Saudi Med J 2009; Vol30(1)                                                                                                                                                                 |
| Zimbabwe     | No        | FFQ development          | Development of FFQ Merchant et al. Nutr J. 2005;4:37                                                                                                                                                      |

**Table S2-A: De-attenuated Correlation Coefficients of Nutrient Intake**

| Country      | Vegetables | Fruits | Dairy | Whole Grains | Refined grains | White meat | Red meat | Processed foods |
|--------------|------------|--------|-------|--------------|----------------|------------|----------|-----------------|
| Brazil       | 0.55       | 0.52   | 0.63  | 0.35         | 0.73           | 0.21       | 0.34     | 0.27            |
| Chile        | 0.77       | 0.66   | 0.55  | 0.71         | 0.63           | NR         | NR       | NR              |
| China        | 0.42       | 0.40   | 0.68  | 0.80         | 0.87           | 0.69       | 0.58     | NR              |
| Iran         | 0.46       | 0.54   | 0.52  | NR           | 0.54           |            |          | NR              |
| Sweden       | 0.58       | 0.59   | 0.62  | 0.61         | 0.49           | 0.66       | 0.56     | 0.65            |
| South Africa | 0.41       | 0.38   | 0.14  | 0.56         | 0.25           | 0.35       | NR       | NR              |
| Turkey       | 0.29       | 0.29   | 0.39  | NR           | 0.57           | NR         | 0.48     | NR              |

NR: not reported

**Table S2-B: De-attenuated correlation coefficients of Food Intake (g/d)**

| Country      | Energy/kcal       | CHO/g | Fat/g | Protein/g | SFA/mg | PUFA/mg | Cholesterol/mg |
|--------------|-------------------|-------|-------|-----------|--------|---------|----------------|
| Argentina    | 0.53              | 0.57  | 0.50  | 0.53      | 0.52   | 0.48    | 0.57           |
| Canada       | NR                | 0.60  | 0.62  | 0.57      | 0.65   | 0.48    | 0.73           |
| Chile        | NR                | 0.62  | 0.81  | 0.10      | 0.66   | 0.41    | NR             |
| China        | 0.65              | 0.61  | 0.63  | 0.63      | 0.73   | 0.61    | 0.57           |
| Colombia     | 0.57              | 0.77  | 0.43  | 0.51      | 0.30   | 0.52    | NR             |
| Iran         | 0.62              | 0.58  | 0.51  | 0.57      | 0.45   | 0.42    | NR             |
| India        | 0.52              | 0.59  | 0.54  | 0.52      | NR     | NR      | NR             |
| Palestine    | Under preparation |       |       |           |        |         |                |
| Poland       | 0.56              | 0.60  | 0.61  | 0.53      | 0.63   | 0.48    | 0.76           |
| South Africa | 0.31              | 0.31  | 0.25  | 0.30      | NR     | NR      | NR             |
| Turkey       | 0.65              | 0.63  | 0.63  | 0.49      | NR     | 0.36    | 0.34           |
| UAE/Kuwait   | 0.72              | 0.74  | 0.69  | 0.70      | 0.62   | 0.64    | 0.81           |
| Zimbabwe     | 0.99              | 0.99  | 0.97  | 0.94      | NR     | NR      | NR             |

NR: not reported

**Table S2-C: Correlation between serum triglycerides and white rice intake (n=132,373)**

|                        | White rice intake (grams/day) |                  |                  |                  | p-trend |
|------------------------|-------------------------------|------------------|------------------|------------------|---------|
|                        | <150g/d                       | 150-300g/d       | 300-450g/d       | >450g/d          |         |
|                        | <b>N=71,914</b>               | <b>N= 16,976</b> | <b>N= 14,010</b> | <b>N= 29,473</b> |         |
| Triglycerides (mmol/l) | 0.004 (0.01)                  | 0.007 (0.01)     | 0.05 (0.01)      | 0.06 (0.02)      | 0.008   |

**Table S3: Baseline characteristics of study participants by geographic region (n=132,373)**

|                                      | <b>Overall<br/>(n=132,373)</b> | <b>North America &amp;<br/>Europe<br/>(n= 14,552)</b> | <b>South America<br/>(n=21,442)</b> | <b>Africa<br/>(n=5,881)</b> | <b>Middle East<br/>(n=11,756)</b> | <b>South East Asia<br/>(n=10,596)</b> | <b>China<br/>(n=41,727)</b> | <b>South Asia<br/>(n=26,419)</b> |
|--------------------------------------|--------------------------------|-------------------------------------------------------|-------------------------------------|-----------------------------|-----------------------------------|---------------------------------------|-----------------------------|----------------------------------|
| Age (years)                          | 50.0 (9.9)                     | 53.1 (9.2)                                            | 50.9 (9.7)                          | 49.5 (10.6)                 | 47.6 (9.1)                        | 51.1 (9.8)                            | 50.6 (9.7)                  | 47.6 (10.1)                      |
| Body mass index (kg/m <sup>2</sup> ) | 25.5 (5.2)                     | 27.1 (4.9)                                            | 27.8 (5.3)                          | 26.0 (7.1)                  | 28.8 (5.5)                        | 25.6 (4.9)                            | 24.5 (3.6)                  | 22.7 (4.9)                       |
| Men (%)                              | 41.5                           | 44.3                                                  | 38.5                                | 30.8                        | 45.6                              | 40.5                                  | 41.5                        | 43.3                             |
| Urban (%)                            | 52.0                           | 70.4                                                  | 56.6                                | 47.9                        | 59.7                              | 45.7                                  | 47.3                        | 45.7                             |
| Physical inactivity (%)              | 17.4                           | 5.9                                                   | 13.2                                | 20.0                        | 26.8                              | 29.0                                  | 15.5                        | 21.2                             |
| Current smoker (%)                   | 11.5                           | 36.5                                                  | 22.3                                | 4.8                         | 9.1                               | 8.0                                   | 4.6                         | 3.9                              |
| <b>Diet</b>                          |                                |                                                       |                                     |                             |                                   |                                       |                             |                                  |
| Energy intake, Kcal                  | 2020 (1562-2611)               | 2149 (1648-2754)                                      | 2110 (1641-2665)                    | 1838 (1320-2572)            | 2217 (1732-2823)                  | 2432 (1740-3178)                      | 1900 (1501-2379)            | 1938 (1507-2557)                 |
| Fiber intake (g/day)                 | 19.1 (11.3-29.5)               | 26.1 (18.6-36.4)                                      | 23.6 (17.4-31.2)                    | 26.1 (17.6-41.0)            | 30.5 (22.6-41.2)                  | 8.9 (5.2-13.1)                        | 19.9 (12.7-29.5)            | 10.1 (6.7-15.1)                  |
| %E from carbohydrate                 | 60.9 (53.0-69.9)               | 52.1 (46.8-57.9)                                      | 58.2 (49.9-65.9)                    | 60.0 (53.0-69.5)            | 54.2 (49.4-58.8)                  | 54.6 (49.0-60.1)                      | 68.3 (61.0-74.5)            | 64.6 (57.8-75.7)                 |
| %E from fat                          | 24.0 (16.2-30.3)               | 30.4 (26.5-34.3)                                      | 24.8 (19.3-30.5)                    | 25.0 (18.0-31.7)            | 29.8 (26.2-33.8)                  | 28.9 (24.7-33.0)                      | 16.3 (11.7-22.3)            | 23.5 (13.1-29.6)                 |
| %E from protein                      | 15.0 (12.6-17.4)               | 16.5 (14.9-18.3)                                      | 17.0 (14.9-19.5)                    | 13.4 (11.6-15.5)            | 16.6 (14.9-18.2)                  | 16.6 (14.5-18.8)                      | 14.9 (13.2-16.9)            | 11.3 (10.1-12.7)                 |

South Asia includes India, Pakistan and Bangladesh.

South East Asia includes Malaysia, Philippines

Values are median (IQR) unless stated otherwise

**Table S4: Baseline characteristics of study participants – overall, South Asia, Rest of the world and China**

|                                      | <b>Overall<br/>(n=132,373)</b> | <b>South Asia<br/>(N=26,419)</b> | <b>Rest of the world<br/>(N=64,227)</b> | <b>China<br/>(n=41,727)</b> |
|--------------------------------------|--------------------------------|----------------------------------|-----------------------------------------|-----------------------------|
| Age (years)                          | 50.0 (9.9)                     | 47.6 (10.1)                      | 50.7 (9.8)                              | 50.6 (9.7)                  |
| Body mass index (kg/m <sup>2</sup> ) | 25.5 (5.2)                     | 22.7 (4.9)                       | 27.4 (5.5)                              | 24.5 (3.6)                  |
| Waist hip ratio                      | 0.87 (0.08)                    | 0.86 (0.09)                      | 0.88 (0.08)                             | 0.86 (0.07)                 |
| Men (n, %)                           | 54,902 (41.5)                  | 11,441 (43.3)                    | 26,141 (40.7)                           | 17,320 (41.5)               |
| Urban (n, %)                         | 68,860 (52)                    | 12,060 (45.7)                    | 37,063 (57.7)                           | 19,737 (47.3)               |
| Physical inactivity (%)              | 21,471 (21)                    | 4,935 (21.2)                     | 10,178 (17.3)                           | 6,358 (15.5)                |
| <b>Diet<sup>s</sup></b>              |                                |                                  |                                         |                             |
| Energy intake, Kcal                  | 2020 (1562-2611)               | 2091 (823)                       | 2283 (873)                              | 1976 (666)                  |
| Fiber intake (g/day)                 | 19.1 (11.3-29.5)               | 12.4 (6.7-15.0)                  | 26 (14.9-33.3)                          | 22.4 (12.7-29.5)            |
| %E from carbohydrate                 | 60.9 (53.0-69.9)               | 66 (57.7-75.7)                   | 56 (48.9-61.8)                          | 67 (61-64.5)                |
| %E from fat                          | 24.0 (16.2-30.3)               | 22.1 (13.1-29.6)                 | 27.8 (23.0-32.8)                        | 17.6 (11.7-22.3)            |
| %E from protein                      | 15.0 (12.6-17.4)               | 11.5 (10.1-12.7)                 | 16.7 (14.5-18.6)                        | 15.2 (13.2-16.9)            |

South Asia includes India, Pakistan and Bangladesh

Rest of the world includes South East Asia, Middle East, South America, North America/Europe and Africa.

<sup>s</sup>Values are median (IQR) unless stated otherwise

**Table S5 A: Association between white rice intake and incident diabetes – stratified by family history**

|                                                                                                                                                                                                              | White rice intake (grams/day) |                  |                  |                  |
|--------------------------------------------------------------------------------------------------------------------------------------------------------------------------------------------------------------|-------------------------------|------------------|------------------|------------------|
|                                                                                                                                                                                                              | <150g/d                       | ≥150 to <300g/d  | ≥300 to <450g/d  | ≥450g/d          |
| <b>No family history (n=95,666)</b>                                                                                                                                                                          | <b>N=54,640</b>               | <b>N=12,601</b>  | <b>N=10,026</b>  | <b>N=18,399</b>  |
| Diabetes events (%)                                                                                                                                                                                          | 1822 (3.3)                    | 520 (4.1)        | 358 (3.6)        | 717 (3.9)        |
| Minimally adjusted model                                                                                                                                                                                     | 1.00                          | 1.12 (1.00-1.26) | 1.24 (1.07-1.43) | 1.16 (1.00-1.36) |
| Fully adjusted model adjusted for age, sex, BMI, WHR, physical activity, education, location, smoking, energy intake, refined grain and whole grain, fruits and vegetables and study center as random effect | 1.00                          | 1.14 (1.00-1.30) | 1.32 (1.13-1.55) | 1.30 (1.07-1.56) |
| <b>Positive family history (n=24,662)</b>                                                                                                                                                                    | <b>N=15,269</b>               | <b>N=3,608</b>   | <b>N=2,847</b>   | <b>N= 2,938</b>  |
| Diabetes events (%)                                                                                                                                                                                          | 1,059 (6.9)                   | 360 (10.0)       | 209 (7.3)        | 298 (10.1)       |
| Minimally adjusted model                                                                                                                                                                                     | 1.00                          | 1.10 (0.94-1.28) | 1.18 (0.97-1.43) | 1.19 (0.95-1.50) |
| Fully adjusted model adjusted for age, sex, BMI, WHR, physical activity, education, location, smoking, energy intake, refined grain and whole grain, fruits and vegetables and study center as random effect | 1.00                          | 1.11 (0.94-1.31) | 1.14 (0.92-1.42) | 1.10 (0.83-1.46) |

p-for interaction = 0.22

**Table S5 B: Association between white rice intake and incident diabetes – stratified by physical activity**

|                                                                                                                                                                                            | White rice intake (grams/day) |                  |                  |                  |
|--------------------------------------------------------------------------------------------------------------------------------------------------------------------------------------------|-------------------------------|------------------|------------------|------------------|
|                                                                                                                                                                                            | <150g/d                       | ≥150 to <300g/d  | ≥300 to <450g/d  | ≥450g/d          |
| <b>Physically inactive (n=21,471)</b>                                                                                                                                                      | <b>11,409</b>                 | <b>2,845</b>     | <b>2,035</b>     | <b>5,182</b>     |
| Diabetes events (%)                                                                                                                                                                        | 500 (4.4)                     | 158 (5.6)        | 99 (4.9)         | 323 (6.2)        |
| Minimally adjusted model                                                                                                                                                                   | 1.00                          | 1.13 (0.92-1.39) | 1.24 (0.96-1.60) | 1.39 (1.08-1.79) |
| Model adjusted for age, sex, bmi, whr, family history, education, location, smoking, energy intake, refined grain and whole grain, fruits and vegetables and study center as random effect | 1.00                          | 1.18 (0.93-1.51) | 1.38 (1.02-1.86) | 1.50 (1.08-2.09) |
| <b>Physically active (n=101,764)</b>                                                                                                                                                       | <b>54,154</b>                 | <b>13,261</b>    | <b>11,307</b>    | <b>23,042</b>    |
| Diabetes events (%)                                                                                                                                                                        | 2240 (4.1)                    | 731 (5.5)        | 504 (4.5)        | 1189 (5.2)       |

|                                                                                                                                                          |      |                  |                  |                  |
|----------------------------------------------------------------------------------------------------------------------------------------------------------|------|------------------|------------------|------------------|
| Minimally adjusted for age, sex and study center as random effect                                                                                        | 1.00 | 1.12 (1.01-1.25) | 1.20 (1.05-1.36) | 1.11 (0.96-1.27) |
| Model adjusted for age, sex, bmi, whr, family history, education, location, smoking, energy intake, refined grain and whole grain, fruits and vegetables | 1.00 | 1.11 (0.99-1.24) | 1.21 (1.05-1.40) | 1.16 (0.97-1.38) |

p-for interaction = 0.47

Physically inactive = <600 MET × min per week and <150 min per week of moderate intensity physical activity.

Physically active = >600 MET × min per week of moderate intensity physical activity.

**Table S5 C: Association between white rice intake and incident diabetes - stratified by BMI**

|                                                                                                                                                                                                          | White rice intake (grams/day) |                  |                  |                  |
|----------------------------------------------------------------------------------------------------------------------------------------------------------------------------------------------------------|-------------------------------|------------------|------------------|------------------|
|                                                                                                                                                                                                          | <150g/d                       | ≥150 to <300g/d  | ≥300 to <450g/d  | ≥450g/d          |
| <b>BMI &lt;25 (n=62,446)</b>                                                                                                                                                                             | <b>29,161</b>                 | <b>7,275</b>     | <b>6,826</b>     | <b>19,184</b>    |
| Diabetes events (%)                                                                                                                                                                                      | 459 (1.6)                     | 190 (2.6)        | 137 (2.0)        | 779 (4.1)        |
| Minimally adjusted for age, sex and study center as random effect                                                                                                                                        | 1.00                          | 1.27 (1.04-1.54) | 1.21 (0.95-1.53) | 1.37 (1.10-1.71) |
| Model adjusted for age, sex, WHR, family history, physical activity, education, location, smoking, energy intake, refined grain and whole grain, fruits and vegetables and study center as random effect | 1.00                          | 1.12 (0.90-1.41) | 1.20 (0.91-1.58) | 1.25 (0.93-1.68) |
| <b>BMI &gt;25 (n=62,733)</b>                                                                                                                                                                             | <b>38,531</b>                 | <b>8,713</b>     | <b>6,615</b>     | <b>8,874</b>     |
| Diabetes events (%)                                                                                                                                                                                      | 2378 (6.2)                    | 686 (7.9)        | 468 (7.1)        | 775 (8.7)        |
| Minimally adjusted for age, sex and study center as random effect                                                                                                                                        | 1.00                          | 1.07 (0.96-1.19) | 1.20 (1.05-1.37) | 1.26 (1.09-1.45) |
| Model adjusted for age, sex, WHR, family history, physical activity, education, location, smoking, energy intake, refined grain and whole grain, fruits and vegetables and study center as random effect | 1.00                          | 1.11 (1.00-1.25) | 1.25 (1.08-1.44) | 1.19 (0.99-1.44) |

P for interaction = 0.006



**Table S5 D: Association between white rice intake and incident diabetes - stratified by WHR**

|                                                                                                                                                                                                          | White rice intake (grams/day) |                  |                  |                  |
|----------------------------------------------------------------------------------------------------------------------------------------------------------------------------------------------------------|-------------------------------|------------------|------------------|------------------|
|                                                                                                                                                                                                          | <150g/d                       | ≥150 to <300g/d  | ≥300 to <450g/d  | ≥450g/d          |
| <b>Low WHR (&lt;0.90 in men, &lt;0.80 in women)<br/>(N=46,625)</b>                                                                                                                                       | <b>23,019</b>                 | <b>5,651</b>     | <b>4,424</b>     | <b>13,531</b>    |
| Diabetes events (%)                                                                                                                                                                                      | 365 (1.6)                     | 139 (2.5)        | 98 (2.2)         | 401 (3.0)        |
| Minimally adjusted for age, sex and study centre                                                                                                                                                         | 1.00                          | 1.22 (0.97-1.53) | 1.27 (0.96-1.67) | 1.18 (0.90-1.54) |
| Model adjusted for age, sex, BMI, family history, physical activity, education, location, smoking, energy intake, refined grain and whole grain, fruits and vegetables and study center as random effect | 1.00                          | 1.19 (0.92-1.55) | 1.46 (1.07-1.99) | 1.52 (1.09-2.12) |
| <b>High WHR (&gt;0.90 in men, &gt;0.80 in women)<br/>(N=78,822)</b>                                                                                                                                      | <b>44,710</b>                 | <b>10,383</b>    | <b>9,070</b>     | <b>14,659</b>    |
| Diabetes events (%)                                                                                                                                                                                      | 2447 (5.5)                    | 732 (7.1)        | 506 (5.6)        | 1152 (7.9)       |
| Minimally adjusted for age, sex and study centre                                                                                                                                                         | 1.00                          | 1.08 (0.97-1.20) | 1.16 (1.02-1.31) | 1.22 (1.07-1.40) |
| Model adjusted for age, sex, BMI, family history, physical activity, education, location, smoking, energy intake, refined grain and whole grain, fruits and vegetables and study center as random effect | 1.00                          | 1.11 (0.99-1.24) | 1.22 (1.06-1.41) | 1.17 (0.98-1.40) |

p-for interaction = 0.46

**Table S6: Association of white rice intake with incident diabetes – in different world regions**

|                                        | White rice intake (grams/day) |                   |                   |
|----------------------------------------|-------------------------------|-------------------|-------------------|
|                                        | <150g/d                       | 150-300g/d        | >300g/d           |
| <b>South Asia (n=26,419)</b>           | <b>N=7,227</b>                | <b>N=1,672</b>    | <b>N=17,520</b>   |
| Diabetes events N (%)                  | 343 (4.8)                     | 114 (6.8)         | 1382 (7.9)        |
| Minimally adjusted model               | 1.00                          | 1.19 (0.93-1.52)  | 1.22 (0.97-1.53)  |
| Fully adjusted model <sup>^</sup>      | 1.00                          | 1.27 (0.87-1.87)  | 1.64 (1.17-2.31)  |
| <b>China (n=41,727)</b>                | <b>N=17,889</b>               | <b>N=7,300</b>    | <b>N=16,538</b>   |
| Diabetes events N (%)                  | 520 (2.9)                     | 231 (3.2)         | 440 (2.7)         |
| Minimally adjusted model               | 1.00                          | 1.02 (0.86-1.21)  | 1.21 (1.00-1.46)  |
| Fully adjusted model <sup>^</sup>      | 1.00                          | 0.98 (0.81-1.19)  | 1.25 (0.99-1.58)  |
| <b>South East Asia (n=10,596)</b>      | <b>N=3,696</b>                | <b>N=2,606</b>    | <b>N=4,294</b>    |
| Diabetes events N (%)                  | <b>75 (2.0)</b>               | <b>104 (4.00)</b> | <b>160 (3.7)</b>  |
| Minimally adjusted model               | 1.00                          | 1.66 (1.21-2.27)  | 1.98 (1.43-2.75)  |
| Fully adjusted model <sup>^</sup>      | 1.00                          | 1.26 (0.82-1.95)  | 1.21 (0.75-1.95)  |
| <b>Middle East (n=8,379)</b>           | <b>N=5,076</b>                | <b>N=2,725</b>    | <b>N=578</b>      |
| Diabetes events N (%)                  | 410 (8.1)                     | 288 (10.6)        | 70 (12.1)         |
| Minimally adjusted model               | 1.00                          | 1.08 (0.91-1.28)  | 1.25 (0.96-1.65)  |
| Fully adjusted model <sup>^</sup>      | 1.00                          | 1.10 (0.91-1.33)  | 1.22 (0.90-1.66)  |
| <b>South America (n=21,442)</b>        | <b>N=15,161</b>               | <b>N=1,808</b>    | <b>N=4,473</b>    |
| Diabetes events N (%)                  | 646 (4.3)                     | 157 (8.7)         | 193 (4.3)         |
| Minimally adjusted model               | 1.00                          | 1.69 (1.32-2.17)  | 1.16 (0.93-1.44)  |
| Fully adjusted model <sup>^</sup>      | 1.00                          | 1.69 (1.31-2.18)  | 1.18 (0.93-1.48)  |
| <b>North America/Europe (n=17,929)</b> | <b>N=17,598</b>               | <b>N=324</b>      | <b>N=7</b>        |
| Diabetes events N (%)                  | 872 (4.9)                     | 13 (4.0)          | 1 (14.3)          |
| Minimally adjusted model               | 1.00                          | 0.80 (0.46-1.38)  | 6.68 (0.93-47.79) |
| Fully adjusted model <sup>^</sup>      | 1.00                          | 0.87 (0.50-1.52)  | 5.17 (0.71-37.91) |
| <b>Africa (n=5,881)</b>                | <b>N=5,267</b>                | <b>N=541</b>      | <b>N=73</b>       |
| Diabetes events N (%)                  | 94 (1.8)                      | 15 (2.8)          | 1 (1.37)          |
| Minimally adjusted model               | 1.00                          | 1.53 (0.88-2.66)  | 0.73 (0.10-5.27)  |
| Fully adjusted model <sup>^</sup>      | 1.00                          | 1.85 (0.70-4.90)  | 5.44 (0.70-42.28) |

Minimally adjusted for age, sex and study centre as random effect.

Full model adjusted for age, sex, family history of diabetes, education, location, smoking, physical activity, energy intake, whole grains and refined grains, fruits and vegetables, wealth index and study centre as random effect.

**Figure S1 A: Pooled analysis of PURE regions:**

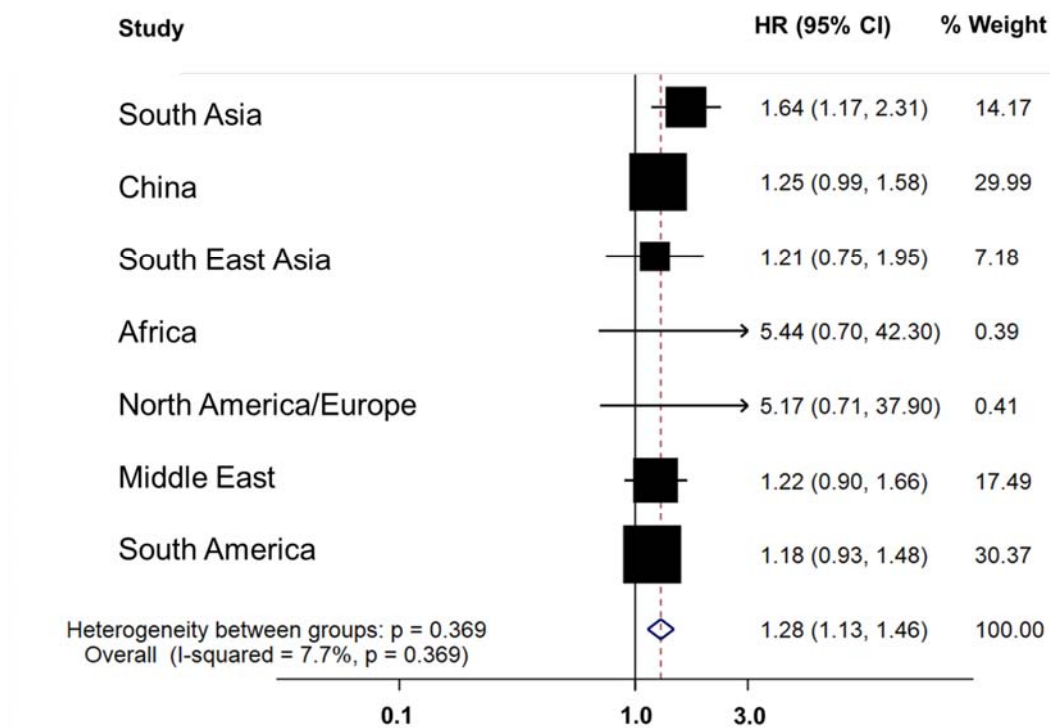

**Figure S1 B – Pooled analysis of PURE regions - Sensitivity Analysis – excluding North America/Europe and Africa**

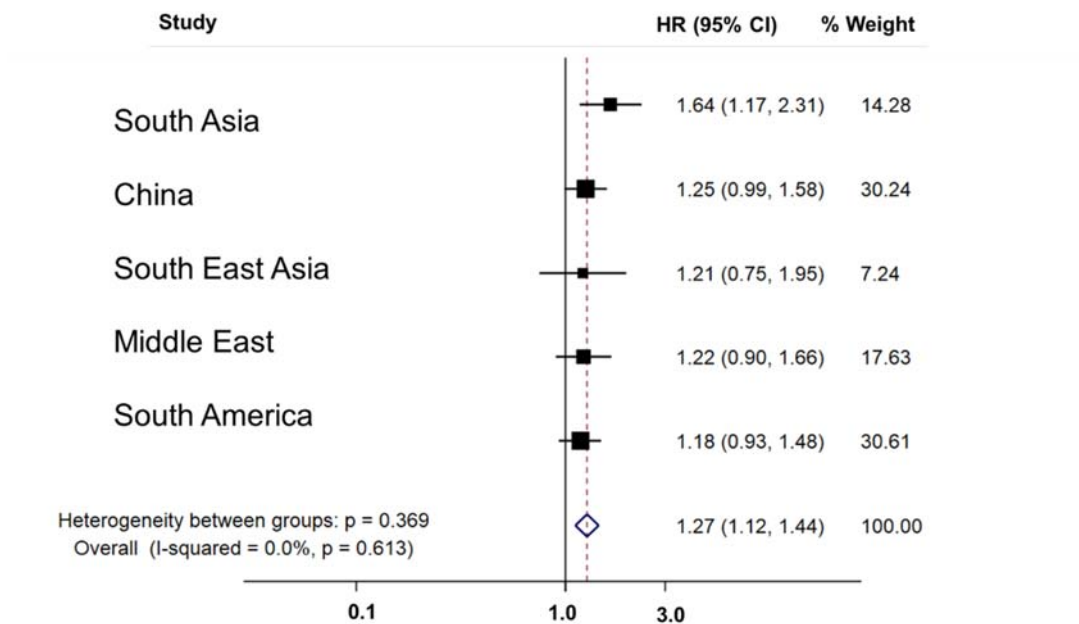

Supplement: Supplementary file 1 [file 2]
