# Supplementary material
Source: publisher figshare collection journal article supplement (https://diabetesjournals.figshare.com/articles/dataset/_/12654227)
Supplement: Supplementary file 2 [file 2]

## **Acknowledgements:**

### **PURE Project Office Staff, National Coordinators, Investigators, and Key Staff:**

**Project office (Population Health Research Institute, Hamilton Health Sciences and McMaster University, Hamilton, Canada):** S Yusuf\* (Principal Investigator).

S Rangarajan (Program Manager); K K Teo, S S Anand, C K Chow, M O'Donnell, A Mente, D Leong, A Smyth, P Joseph, M Duong, R D'Souza, M Walli-Attaei, S Islam (Statistician), W Hu (Statistician), C Ramasundarahettige (Statistician), P Sheridan (Statistician), S Bangdiwala, L Dyal, B Liu (Biometric Programmer), C Tang (Biometric Programmer), X Yang (Biometric Programmer), R Zhao (Biometric Programmer), L Farago (ICT), M Zarate (ICT), J Godreault (ICT), M Haskins (ICT), M Jethva (ICT), G Rigitano (ICT), A Vaghela (ICT), M Dehghan (Nutrition Epidemiologist), A Aliberti, A Reyes, A Zaki, B Connolly, B Zhang, D Agapay, D Krol, E McNeice, E Ramezani, F Shifaly, G McAlpine, I Kay, J Rimac, J Swallow, M Di Marino, M Jakymyshyn, M(a) Mushtaha, M(o) Mushtaha, M Trottier, N Aoucheva, N Kandy, P Mackie, R Buthool, R Patel, R Solano, S Gopal, S Ramacham, S Trottier

**Core Laboratories:** G Pare, M McQueen, S Lamers, J Keys (Hamilton), X Wang (Beijing, China), A Devanath (Bangalore, India).

**Argentina:** R Diaz\*, A Orlandini, P Lamelas, M L Diaz, A Pascual, M Salvador, C Chacon;

**Bangladesh:** O Rahman\*, R Yusuf\*, S A K S. Ahmed, T Choudhury, M Sintaha, A Khan, O Alam, N, Nayeem, S N Mitra, S Islam, F Pasha; **Brazil:** A Avezum\*, C S Marcilio, A C Mattos, G B Oliveira;

**Canada:** K Teo\*, S Yusuf\*, Sumathy Rangarajan, A Arshad, B Bideri, I Kay, J Rimac, R Buthool, S Trottier, G Dagenais, P Poirier, G Turbide, AS Bourlaud, A LeBlanc De Bluts, M Cayer, I Tardif, M Pettigrew, S Lear, V de Jong, A N Saidy, V Kandola, E Corber, I Vukmirovich, D Gasevic, A Wielgosz, A Pipe, A Lefebvre, A Pepe, A Auclair, A Prémont, A S Bourlaud; **Chile:** F Lanas\*, P Serón, M J Oliveros, F Cazor, Y Palacios; **China:** Liu Lisheng\*, Li Wei\*, Chen Chunming<sup>#</sup>, Zhao Wenhua. Hu Bo, Yin Lu, Zhu Jun, Liang Yan, Sun Yi, Wang Yang, Deng Qing, Jia Xuan, He Xinye, Zhang Hongye, Bo Jian, Wang Xingyu, Liu Xu, Gao Nan, Bai Xiulin, Yao Chenrui, Cheng Xiaoru, Wang Chuangshi, Li Sidong, Liu Weida, Lang Xinyue, Liu Xiaoyun, Zhu Yibing, Xie Liya, Liu Zhiguang, Ren Yingjuan, Dai Xi, Gao Liuning, Wang Liping, Su yuxuan, Han Guoliang, Song Rui, Cao Zhuangni, Sun Yaya, Li Xiangrong, Wang Jing, Wang Li, Peng Ya, Li Xiaoqing, Li Ling, Wang Jia, Zou Jianmei, Gao Fan, Tian Shaofang, Liu Lifu, Li Yongmei, Bi Yanhui, Li Xin, Zhang Anran, Wu Dandan, Cheng ying, Xiao Yize, Lu Fanghong, Li Yindong, Hou Yan, Zhang Liangqing, Guo Baoxia, Liao Xiaoyang, Chen Di, Zhang Peng, Li Ning, Ma Xiaolan, Lei Rensheng, Fu Minfan, Liu Yu, Xing Xiaojie, Yang Youzhu, Zhao Shenghu, Xiang Quanyong, Tang Jinhua, Liu Zhengrong, Qiang Deren, Li Xiaoxia, Xu Zhengting,

Aideeraili.Ayoubu, Zhao Qian; **Colombia:** P Lopez-Jaramillo\*, P A Camacho-Lopez, M Perez, J Otero-Wandurraga, D I Molina, C Cure-Cure, JL Accini, E Hernandez, E Arcos, C Narvaez, A Sotomayor, F Manzur, H Garcia, G Sanchez, F Cotes, A Rico, M Duran, C Torres; **India: Bangalore** - P Mony \*, M Vaz\*, S Swaminathan, AV Bharathi, K Shankar, A V Kurpad, K G Jayachitra, H A L Hospital, AR Raju, S Niramala, V Hemalatha, K Murali, C Balaji, A Janaki, K Amaranadh, P Vijayalakshmi, **Chennai** - V Mohan\*, R M Anjana, M Deepa, K Parthiban, L Dhanasekaran, SK Sundaram, M Rajalakshmi, P Rajaneesh, K Munusamy, M Anitha, S Hemavathy, T Rahulashankiruthiyayan, D Anitha, R. Dhanasekar, S. Sureshkumar, D Anitha, K Sridevi, **Jaipur** - R Gupta, R B Panwar, I Mohan, P Rastogi, S Rastogi, R Bhargava, M Sharma, D Sharma, **Trivandrum** - V Raman Kutty, K Vijayakumar, S Nair, Kamala R, Manu MS, Arunlal AR, Veena A, Sandeep P Kumar, Leena Kumari, Tessi R, Jith S, K Ajayan, G Rajasree, AR Renjini, A Deepu, B Sandhya, S Asha, H S Soumya, **Chandigarh**- R Kumar, M Kaur, P V M Lakshmi, V Sagar J S Thakur, B Patro, R Mahajan, A Josh, G Singh, K Sharma, P Chaudary, **Iran:** R Kelishadi\*, A Bahonar, N Mohammadifard, H Heidari, **Kazakhstan:** K Davletov\*, B Assembekov, B Amirov; **Kyrgyzstan:** E Mirrakhimov\*, S Abilova, U Zakirov, U Toktomamatov; **Malaysia: UiTM** - K Yusoff\*, T S Ismail, K Ng, A Devi, N Mat-Nasir, AS Ramli, MNK Nor-Ashikin, R Dasiman, MY Mazapuspavina, F Ariffin, M Miskan, H Abdul-Hamid, S Abdul-Razak, N Baharudin, NMN Mohd-Nasir, SF Badlishah-Sham, MS Mohamed-Yassin, M Kaur, M Koshy, F A Majid, N A Bakar, N Zainon, R Salleh, SR Norlizan, NM Ghazali, M Baharom, H Zulkifli, R Razali, S Ali, CWJCW Hafar, F Basir; **UKM** - Noorhassim Ismail, M J Hasni, M T Azmi, M I Zaleha, R Ismail, K Y Hazdi, N Saian, A Jusoh, N Nasir, A Ayub, N Mohamed, A Jamaludin, Z Rahim; **Occupied Palestinian Territory:** R Khatib\*, U Khammash, R Giacaman; **Pakistan:** R Iqbal\*, R Khawaja, I Azam, K Kazmi; **Peru:** J Miranda\*, A Bernabe Ortiz, W Checkley, R H Gilman, L Smeeth, R M Carrillo, M de los Angeles, C Tarazona Meza; **Philippines:** A Dans\*, H U Co, J T Sanchez, L Pudol, C Zamora-Pudol, L A M Palileo-Villanueva, M R Aquino, C Abaquin, SL Pudol, K Manguiat, S Malayang; **Poland:** W Zatonski\*, A Szuba, K Zatonska, R Ilow<sup>#</sup>, M Ferus, B Regulska-Ilow, D Róžańska, M Wolyniec; **Saudi Arabia:** KF AlHabib\*, M Alshamiri, HB Altaradi, O Alnobani, N Alkamel, M Ali, M Abdulrahman, R Nouri; **South Africa:** L Kruger\*, A Kruger<sup>#</sup>, P Bestra, H Voster, A E Schutte, E Wentzel-Viljoen, FC Eloff, H de Ridder, H Moss, J Potgieter, A Roux, M Watson, G de Wet, A Olckers, J C Jerling, M Pieters, T Hoekstra, T Puoane, R Swart\*, E Igumbor, L Tsolekile, K Ndayi, D Sanders, P Naidoo, N Steyn, N Peer, B Mayosi<sup>#</sup>, B Rayner, V Lambert, N Levitt, T Kolbe-Alexander, L Ntyintyane, G Hughes, J Fourie, M Muzigaba, S Xapa, N Gobile, K Ndayi, B Jwili, K Ndibaza, B Egbujie; **Sweden** A Rosengren\*, K Bengtsson Boström, A Rawshani, A Gustavsson, M Andreasson, L Wirdemann; **Tanzania:** K Yeates\*, M Oresto, N West **Turkey:** A Oguz\*, N Imeryuz, Y

Altuntas, S Gulec, A Temizhan, K Karsidag, K B T Calik, A K Akalin, O T Caklili, M V Keskinler, K Yildiz; **United Arab Emirates:** A H Yusufali, F Hussain, M H S Abdelmotagali, D F Youssef, O Z S Ahmad, F H M Hashem, T M Mamdouh, F M AbdRabbou, S H Ahmed, M A AlOmairi, H M Swidan, M Omran, N A Monsef ; **Zimbabwe:** J Chifamba\*, T Ncube, B Ncube, C Chimhete, G K Neya, T Manenji, L Gwaunza, V Mapara, G Terera, C Mahachi, P Murambiwa, R Mapanga, A Chinhara

\*National Coordinator

# Deceased

### PURE Country Institution Names:

|                     | Institution                                                                                                                                                                       |
|---------------------|-----------------------------------------------------------------------------------------------------------------------------------------------------------------------------------|
| <b>South Africa</b> | Faculty of Health Science<br>North-West University<br>Potchefstroom Campus                                                                                                        |
|                     | University of the Western Cape<br>Department of Dietetics and Nutrition<br>Private Bag X17, 7535<br>Bellville, South Africa                                                       |
| <b>Zimbabwe</b>     | University of Zimbabwe<br>College of Health Sciences<br>Physiology Department<br>Harare, Zimbabwe                                                                                 |
| <b>Tanzania</b>     | Pamoja Tunaweza Health<br>Research Centre, Moshi,<br>Tanzania<br>Division of Nephrology,<br>Department of Medicine<br>Queen's University                                          |
| <b>China</b>        | National Centre for<br>Cardiovascular Diseases<br>Cardiovascular Institute & Fuwai<br>Hospital<br>Chinese Academy of Medical<br>Sciences<br>167, Bei Li Shi Lu, Beijing,<br>China |
|                     | Fuwai Hospital<br>167 Beilishi Rd. Xicheng District<br>Beijing. 100037 China                                                                                                      |
| <b>Philippines</b>  | University of Philippines, Section<br>of Adult Medicine & Medical                                                                                                                 |

|                              |                                                                                                                                                                   |
|------------------------------|-------------------------------------------------------------------------------------------------------------------------------------------------------------------|
|                              | Research Unit, Manila,<br>Philippines                                                                                                                             |
| <b>Pakistan</b>              | Department of Community<br>Health Sciences and Medicine<br>Aga Khan University<br>Stadium Road, P.O Box 3500<br>Karachi Pakistan                                  |
| <b>India,<br/>Bangalore</b>  | St John's Medical College and<br>Research Institute<br>Bangalore 560034, India                                                                                    |
| <b>India,<br/>Chennai</b>    | Madras Diabetes Research<br>Foundation &<br>Dr. Mohan's Diabetes Specialities<br>Centre, Chennai                                                                  |
| <b>India Jaipur</b>          | Eternal Heart Care Centre and<br>Research Institute, Jaipur                                                                                                       |
| <b>India,<br/>Trivandrum</b> | Health Action by People,<br>Thiruvananthapuram, Kerala,<br>695011 INDIA                                                                                           |
| <b>India,<br/>Chandigarh</b> | School of Public Health, Post<br>Graduate Institute of Medical<br>Education & Research,<br>Chandigarh (India)                                                     |
| <b>Bangladesh</b>            | Independent University,<br>Bangladesh<br>Bashundhara, Dhaka<br>Bangladesh                                                                                         |
| <b>Malaysia</b>              | Universiti Teknologi MARA,<br>Sungai Buloh, Selangor, Malaysia<br>AND UCSI University,<br>Cheras, Selangor, Malaysia                                              |
|                              | Department of Community<br>Health. Faculty of Medicine.<br>University Kebangsaan Malaysia.<br>Kuala Lumpur. Malaysia                                              |
| <b>Poland</b>                | Wroclaw Medical University<br>Department of Internal Medicine;<br>Department of Social Medicine<br>Borowska 213 street; 50- 556<br>Wroclaw, Poland                |
|                              | Department of Epidemiology,<br>The Maria Skłodowska-Curie<br>Memorial Cancer Center and<br>Institute of Oncology<br>02-034 Warsaw, 15B Wawelska<br>str.<br>Poland |
| <b>Turkey</b>                | Istanbul Medeniyet University<br>Istanbul, Turkey                                                                                                                 |

|                         |                                                                                                                                                                                       |
|-------------------------|---------------------------------------------------------------------------------------------------------------------------------------------------------------------------------------|
| <b>Sweden</b>           | Sahlgrenska Academy<br>University of Gothenburg<br>Sweden                                                                                                                             |
| <b>Iran</b>             | Isfahan Cardiovascular Research<br>Center, Isfahan Research Institute<br>Isfahan University of Medical<br>Sciences, Isfahan, Iran                                                     |
| <b>UAE</b>              | Dubai Medical University, Hatta<br>Hospital, Dubai Health Authority,<br>Dubai, United Arab Emirates                                                                                   |
| <b>Saudi<br/>Arabia</b> | Department of Cardiac Sciences,<br>King Fahad Cardiac Center<br>College of Medicine<br>King Saud University<br>Riyadh, Saudi Arabia                                                   |
| <b>Palestine</b>        | Institute of Community and<br>Public Health, Birzeit University,<br>Ramallah, occupied Palestinian<br>territory                                                                       |
| <b>Canada</b>           | Université Laval Institut<br>universitaire de cardiologie et de<br>pneumologie de Québec, Quebec<br>Canada G1V 4G5                                                                    |
|                         | Simon Fraser University,<br>Dept. of Biomedical Physiology<br>& Kinesiology, BC, Canada                                                                                               |
|                         | Department of Medicine,<br>University of Ottawa,<br>Ottawa, Canada                                                                                                                    |
|                         | Population Health Research<br>Institute, McMaster University,<br>Hamilton Health Sciences,<br>Hamilton, Ontario, Canada                                                               |
| <b>Argentina</b>        | Estudios Clinicos Latinoamerica<br>ECLA<br>Rosario, Santa Fe<br>Argentina                                                                                                             |
|                         | Department of Chronic Diseases<br>South American Center of<br>Excellence for Cardiovascular<br>Health (CESCAS)<br>Institute for Clinical<br>Effectiveness and Health Policy<br>(IECS) |
| <b>Brazil</b>           | Dante Pazzanese Institute of<br>Cardiology;<br>Hospital Alemao Oswaldo Cruz<br>Sao Paulo, SP Brazil                                                                                   |

|                   |                                                                                                                                                                                                                                                                                                                                        |
|-------------------|----------------------------------------------------------------------------------------------------------------------------------------------------------------------------------------------------------------------------------------------------------------------------------------------------------------------------------------|
| <b>Colombia</b>   | Facultad de Ciencias de la Salud,<br>Universidad de Santander<br>(UDES), Bucaramanga,<br>Santander,<br>Fundacion Oftalmologica de<br>Santander (FOSCAL)<br>Floridablanca-Santander,<br>Colombia                                                                                                                                        |
| <b>Chile</b>      | Universidad de La Frontera<br>Temuco, Chile                                                                                                                                                                                                                                                                                            |
| <b>Ecuador</b>    | DECANO<br>Facultad de Ciencias de la Salud<br>Eugenio Espejo<br>Universidad Tecnológica<br>Equinoccial<br>Dirección: Av. Mariscal Sucre s/n<br>y Av. Mariana de Jesús, Quito<br>Ecuador                                                                                                                                                |
| <b>Peru</b>       | CRONICAS Centro de<br>Excelencia en Enfermedades<br>Crónicas   <a href="http://www.cronicas-upch.pe">www.cronicas-upch.pe</a><br>Universidad Peruana Cayetano<br>Heredia   <a href="http://www.upch.edu.pe">www.upch.edu.pe</a><br>Av. Armendáriz 497, Miraflores,<br>Lima                                                             |
| <b>Russia</b>     | Research Institute for Complex<br>Issues of Cardiovascular<br>Diseases, Kemerovo, Russia<br><br>Institute For Medical Education,<br>Yaroslav-the-Wise Novgorod<br>State University Ministry of<br>Education and Science of the<br>Russian Federation<br>Russia, Saint-Petersburg, 197022,<br>Karpovka river emb., Bld.13,<br>office 28 |
| <b>Kazakhstan</b> | Research Institute of Cardiology<br>& Internal Diseases, Almaty,<br>Kazakhstan                                                                                                                                                                                                                                                         |
| <b>Kyrgyzstan</b> | Kyrgyz Society of Cardiology,<br>National Center of Cardiology<br>and Internal Disease, Bishkek,<br>Kyrgyzstan                                                                                                                                                                                                                         |

### **Funding/Support:**

Dr S Yusuf is supported by the Mary W Burke endowed chair of the Heart and Stroke Foundation of Ontario. The PURE study is an investigator-initiated study that is funded by the Population Health Research Institute, Hamilton Health Sciences Research Institute (HHSRI), the Canadian Institutes of Health Research, Heart and Stroke Foundation of Ontario, Support from Canadian Institutes of Health Research's Strategy for Patient Oriented Research, through the Ontario SPOR Support Unit, as well as the Ontario Ministry of Health and Long-Term Care and through unrestricted grants from several pharmaceutical companies [with major contributions from AstraZeneca (Canada), Sanofi-Aventis (France and Canada), Boehringer Ingelheim (Germany and Canada), Servier, and GlaxoSmithKline], and additional contributions from Novartis and King Pharma and from various national or local organisations in participating countries.

These include: **Argentina:** Fundacion ECLA (**Estudios Clínicos Latino America**) ; **Bangladesh:** Independent University, Bangladesh and Mitra and Associates; **Brazil:** Unilever Health Institute, Brazil; **Canada:** This study was supported by an unrestricted grant from Dairy Farmers of Canada and the National Dairy Council (U.S.), Public Health Agency of Canada and Champlain Cardiovascular Disease Prevention Network; **Chile:** Universidad de La Frontera [DI13-PE11]; **China:** National Center for Cardiovascular Diseases and ThinkTank Research Center for Health Development; **Colombia:** Colciencias (grant 6566-04-18062 and grant 6517-777-58228); **India:** Indian Council of Medical Research; V.M. is involved in the promotion of healthier varieties of rice. **Malaysia:** Ministry of Science, Technology and Innovation of Malaysia (grant number: 100-IRDC/BIOTEK 16/6/21 [13/2007], and 07-05-IFN-BPH 010), Ministry of Higher Education of Malaysia (grant number: 600-RMI/LRGS/5/3 [2/2011]), Universiti Teknologi MARA, Universiti Kebangsaan Malaysia (UKM-Hejim-Komuniti-15-2010); **occupied Palestinian territory:** the United Nations Relief and Works Agency for Palestine Refugees in the Near East, occupied Palestinian territory; International Development Research Centre, Canada; **Philippines:** Philippine Council for Health Research and Development; **Poland:** Polish Ministry of Science and Higher Education (grant number: 290/W-PURE/2008/0), Wroclaw Medical University; **Saudi Arabia:** Saudi Heart Association, Dr.Mohammad Alfagih Hospital, The Deanship of Scientific Research at King Saud University (Research group number: RG -1436-013), Riyadh; Saleh Hamza Serafi Chair for Research of Coronary Heart Disease, Umm AlQura University, Makkah, Saudi Arabia; **South Africa:** The North-West University, SA and Netherlands Programme for Alternative Development, National Research Foundation, Medical Research Council of South Africa, The South Africa Sugar Association, Faculty of Community and Health Sciences; **Sweden:** Grants from the Swedish state under the Agreement concerning research and

education of doctors; the Swedish Heart and Lung Foundation; the Swedish Research Council; the Swedish Council for Health, Working Life and Welfare, King Gustaf V:s and Queen Victoria Freemason's Foundation, AFA Insurance; **Turkey:** Metabolic Syndrome Society, AstraZeneca, Sanofi Aventis; **United Arab Emirates:** Sheikh Hamdan Bin Rashid Al Maktoum Award For Medical Sciences and Dubai Health Authority, Dubai.

**Role of Sponsor:** The external funders and sponsors had no role in the design and conduct of the study; in the collection, analysis, and interpretation of the data; in the preparation, review, or approval of the manuscript; or in the decision to submit the manuscript for publication.
